# Supplementary material
Source: PubMed Central journal article supplement (PMC6709853)
Supplement: NIHMS1531398-supplement-1.pdf [file NIHMS1531398-supplement-1.pdf]

## Supplemental Figure 1

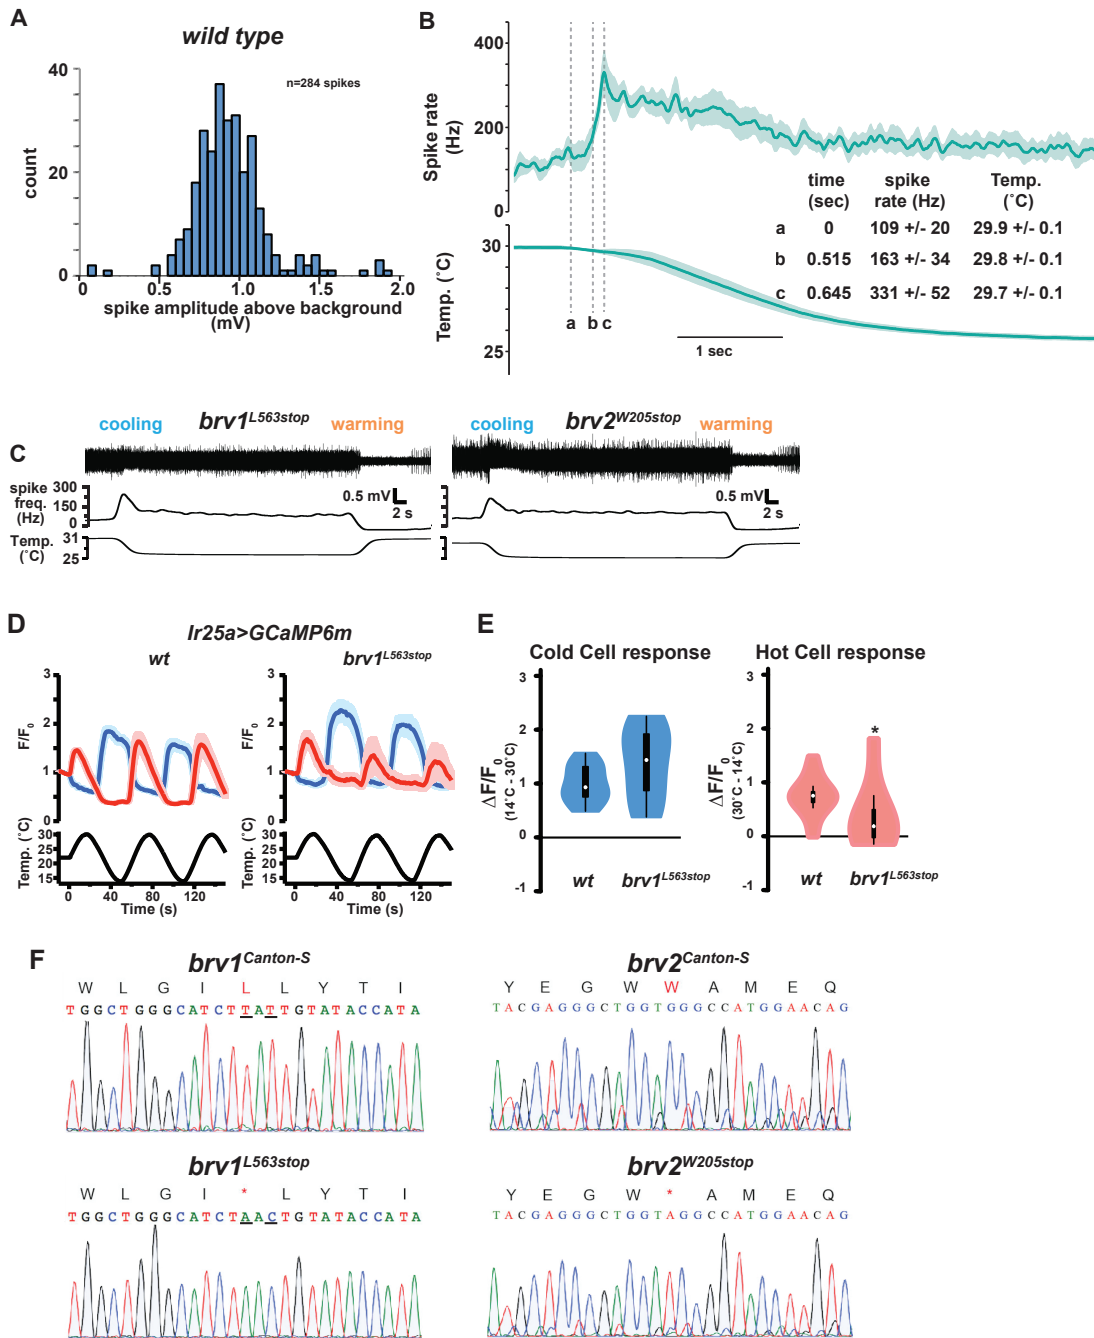

**Supplemental Figure 1, related to Figure 1: Thermoreceptor responses in *wild type* and *brivido (brv)* mutant animals. A, Spike amplitude analysis of spikes from a *wild type* arista held at 25°C. B, PSTH of wild type arista response generated using the same primary data as in Fig. 1B, but shown on an expanded time scale and using a narrower triangular window (100 msec) for improved temporal resolution. Time, temperature, and spike rates provided for indicated time points. n=7 animals, average +/- SEM. C, Representative arista thermoreceptor recordings from indicated genotypes. D, Thermoreceptor responses in *wild type* (*Ir25a-Gal4/UAS-GCaMP6m*) and *brv1<sup>L563stop</sup>* (*Ir25a-Gal4, brv1<sup>L563stop</sup> /UAS-GCaMP6m, brv1<sup>L563stop</sup>*). Traces, F/F<sub>0</sub>, average +/- SEM. Blue line, Cold Cells; red line, Hot Cells. *wild type*, n=19 Cold Cells and 18 Hot Cells from 10 animals, one trial per cell. *brv1<sup>L563stop</sup>*, n=12 Cold Cells and 7 Hot Cells from 6 animals. E, Responses (F/F<sub>0</sub>(14°C) - F/F<sub>0</sub>(30°C)) for Cold Cells, converse for Hot Cells. Cold Cell responses were not statistically distinct between samples. Hot Cell responses were distinct between *wild type* and *brv1<sup>L563stop</sup>* (\*p<0.05, Wilcoxon). F, Sequence traces (with virtual translations) of *brv1* and *brv2* genes confirm the presence of mutations in the indicated genotypes. Nucleotides affected in the mutant alleles are underlined.**

## Supplemental Figure 2

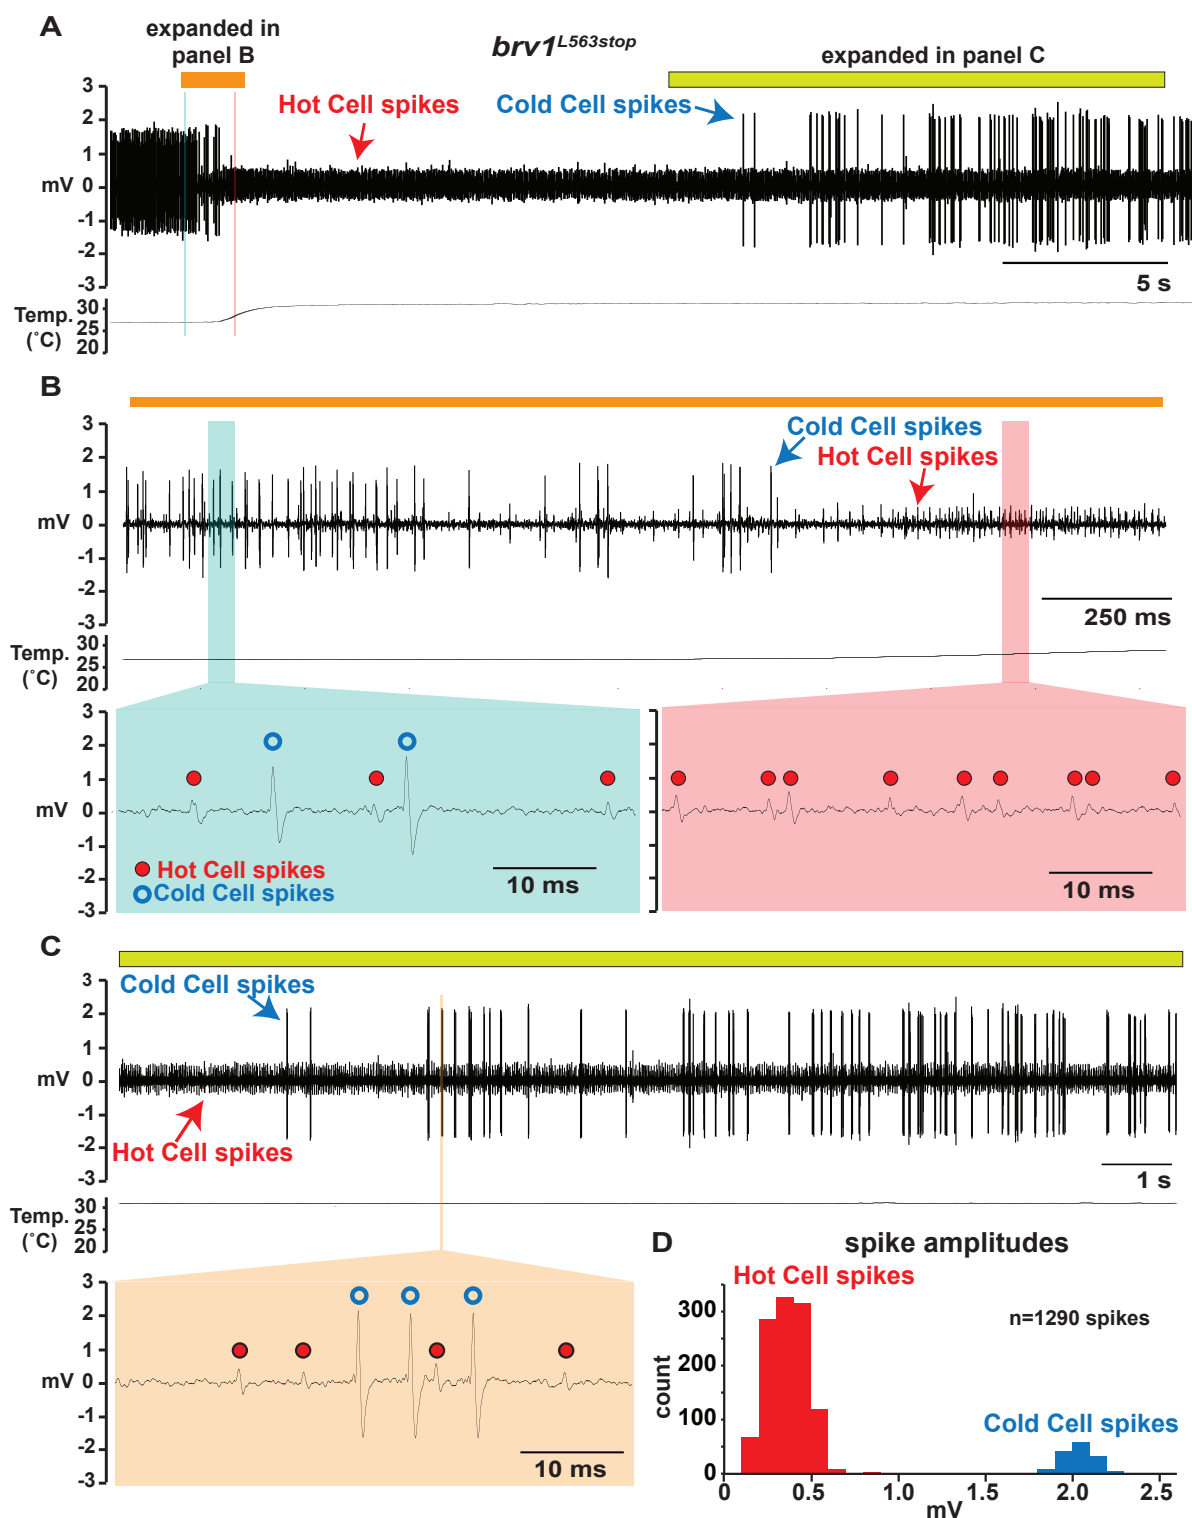

**Supplemental Figure 2, related to Figure 1: Arista recording with unusually high signal to noise ratio.** **A**, Recording of *brv1<sup>L563stop</sup>* animal in which both Hot Cell and Cold Cell spikes were readily detected above noise. **B**, Indicated section of trace from panel A, with two regions shown on an expanded timescale below to highlight individual Hot Cell and Cold Cell spikes. Note the warming-induced decrease in Cold Cell spiking and increase in Hot Cell spiking. **C**, Indicated section of trace from panel A, with one region shown on an expanded timescale below to highlight individual Hot Cell and Cold Cell spikes. **D**, Amplitude histogram of spikes in panel C.

## Supplemental Figure 3

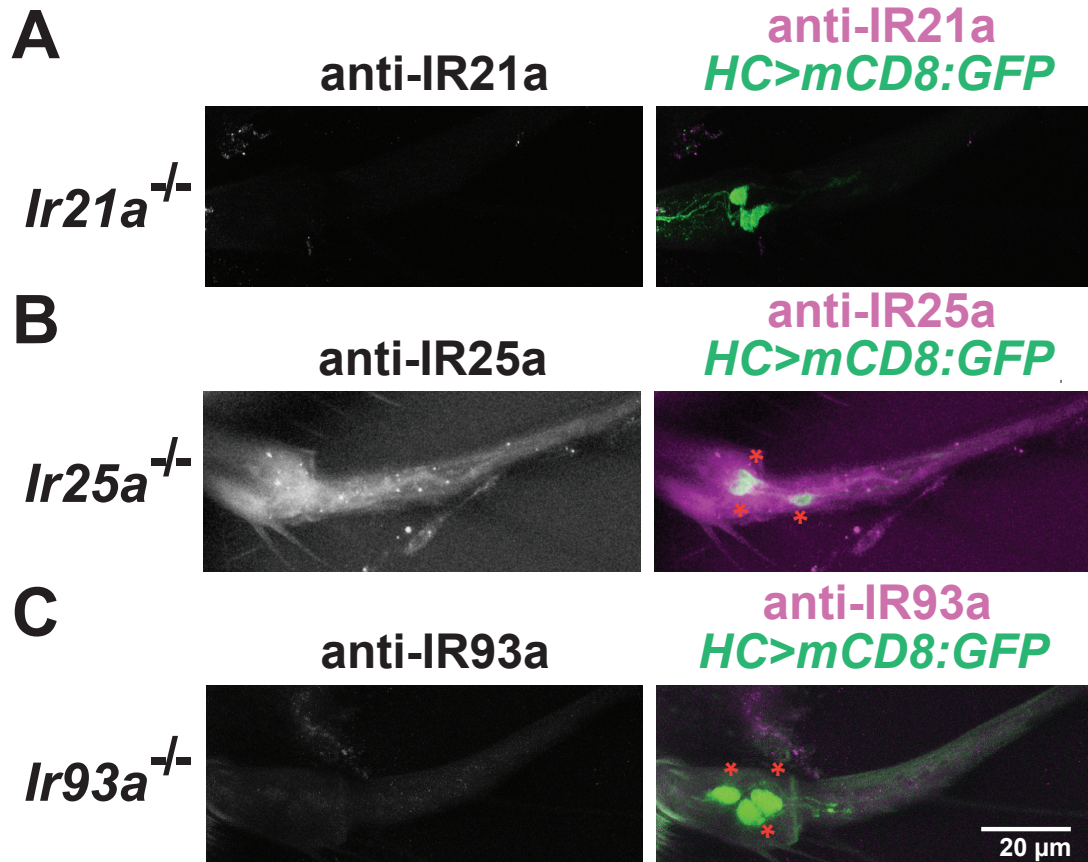

**Supplemental Figure 3, related to Figure 2: IR immunostaining is absent in corresponding mutant animals. A-C, anti-IR21a (A), anti-IR25a (B), and anti-IR93a (C) immunostaining in indicated mutant strains. Right, merge with Hot Cell-specific *HC-Gal4;UAS-GFP*. Red asterisks, Hot Cells.**

## Supplemental Figure 4

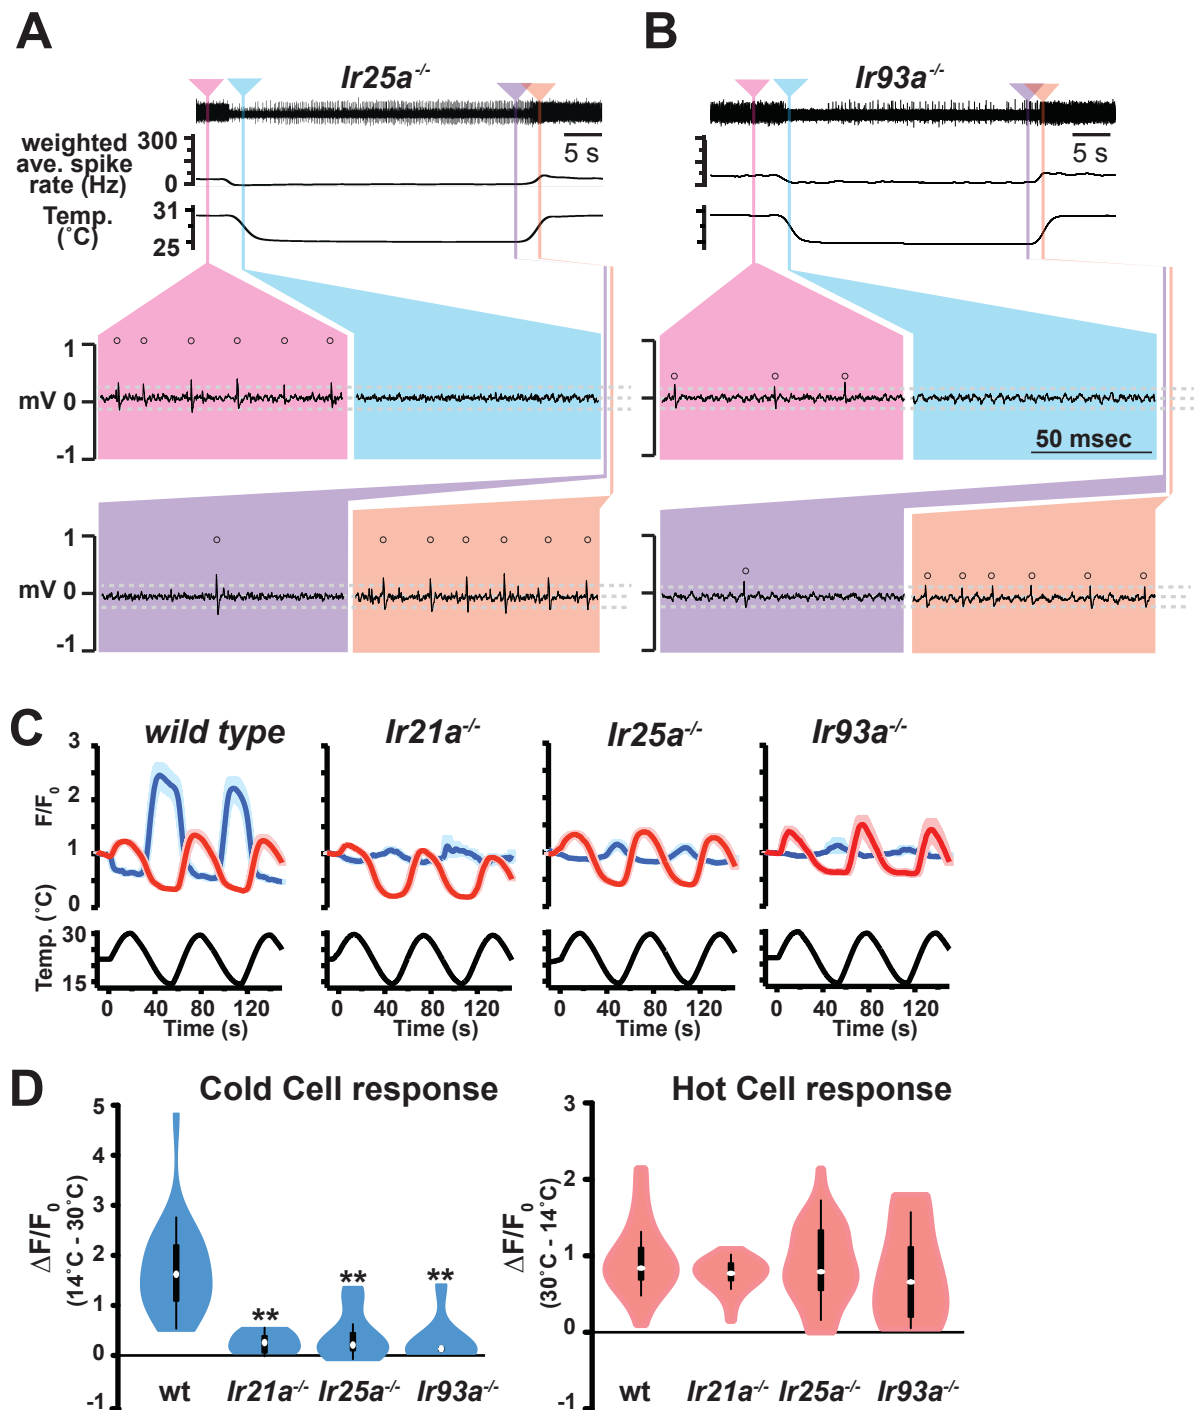

**Supplemental Figure 4, related to Figure 3: *Ir21a*, *Ir25a* and *Ir93a* are specifically required for Cold Cell thermosensing.** A, B, Representative recordings from indicated genotypes, with portions displayed below using an expanded time scale, as in Fig. 3. C, D, Temperature responses of arista thermoreceptors monitored using *GMR11F02>GCaMP6m*. Traces, average  $\pm$  SEM. Blue line denotes Cold Cell responses, Red line denotes Hot Cell responses. *wild type* (*GMR11F02-Gal4; UAS-GCaMP6m*), n=27 Cold Cells, 28 Hot Cells, 10 flies. *Ir21a*<sup>-/-</sup> (*Ir21a* <sup>$\Delta 1$</sup> /*Ir21a* <sup>$\Delta 1$</sup> ; *GMR11F02-Gal4/UAS-GCaMP6m*), n=5 Cold Cells, 24 Hot Cells, 10 flies. *Ir25a*<sup>-/-</sup> (*Ir25a* <sup>$\Delta 2$</sup> /*Ir25a* <sup>$\Delta 2$</sup> ; *GMR11F02-Gal4/UAS-GCaMP6m*), n=14 cold cells, 36 Hot Cells, 14 flies. *Ir93a*<sup>-/-</sup> (*Ir93a*<sup>*M10555*</sup>, *GMR11F02-Gal4/ Ir93a*<sup>*M10555*</sup>, *UAS-GCaMP6m*): n=8 Cold Cells, 18 Hot Cells, 8 flies. \*\* $P < 0.01$  compared to wild type, Steel-Dwass.



## Supplemental Figure 5

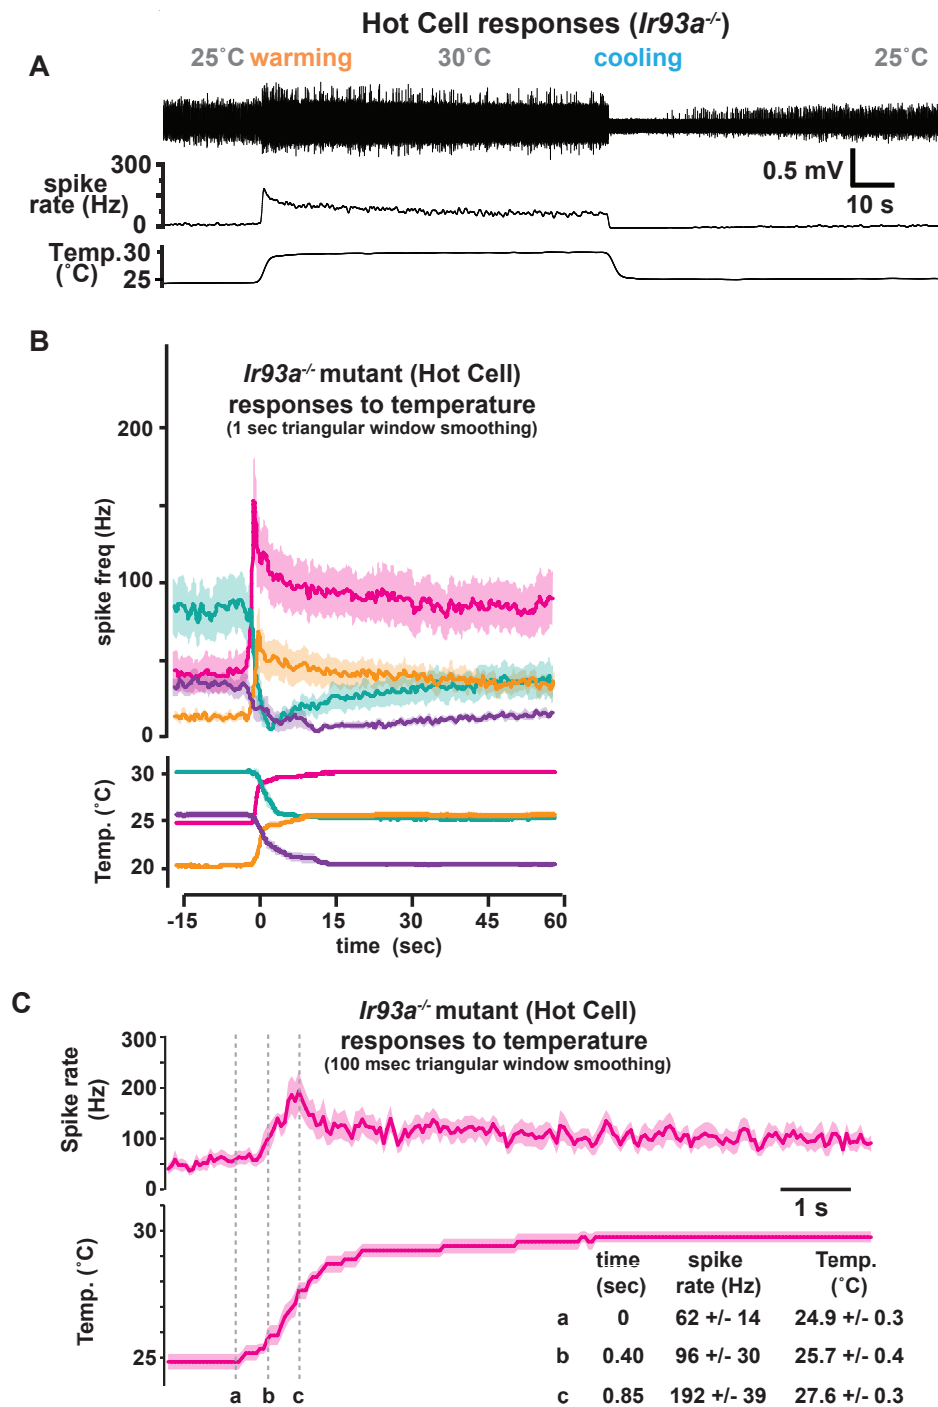

**Supplemental Figure 5, related to Figure 3: Hot Cell responses.** **A**, Representative arista thermoreceptor recording from an *Ir93a* mutant. **B**, PSTHs of responses to indicated temperature stimuli (pink and green traces, n=9 animals each; purple and orange traces, n=10). Instantaneous spike frequencies were smoothed using a 1 sec triangular window. **C**, Time expanded view of initial response of pink trace in panel B. Instantaneous spike frequencies were smoothed using a 100 msec window to maximize temporal resolution.

## Supplemental Figure 6

**A**

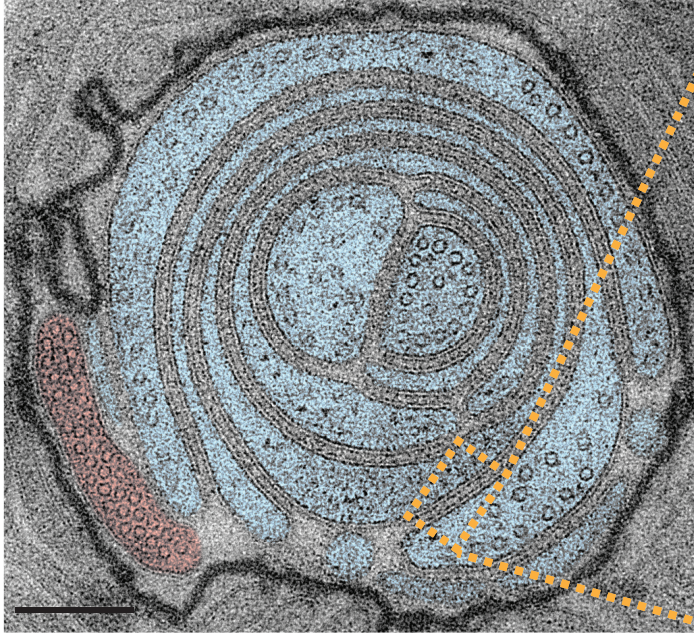

**B**

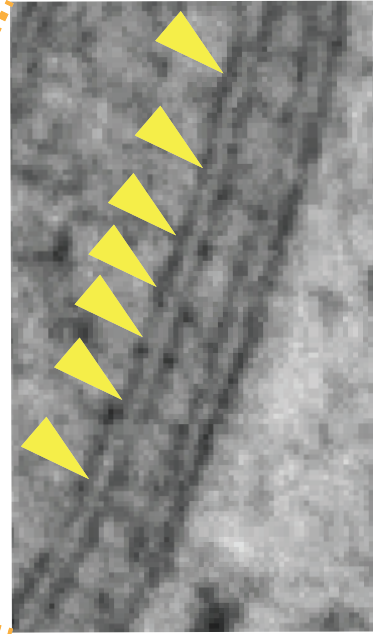

**Supplemental Figure 6, related to Figure 4: BOSS elements in wild type Cold Cells.** Transmission electron micrographs. **A**, EM section through *wild type* arista sensilla near sensillum's distal tip. (The same micrograph as presented in Figure 4, panel B). Hot Cell, red shading. Cold Cell, blue shading. Scale bar: 10  $\mu\text{m}$ , **B**. Expanded view of the indicated region in panel A. Yellow arrowheads denote positions of BOSS elements.
